# Supplementary material
Source: PubMed Central journal article supplement (PMC452598)

# Supplemental Figure 1

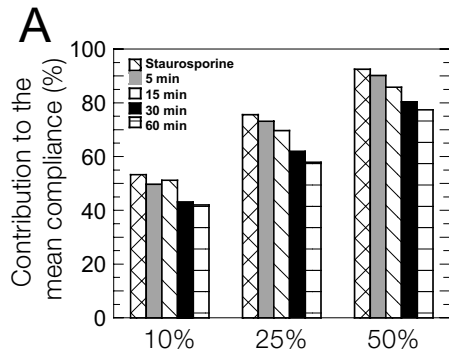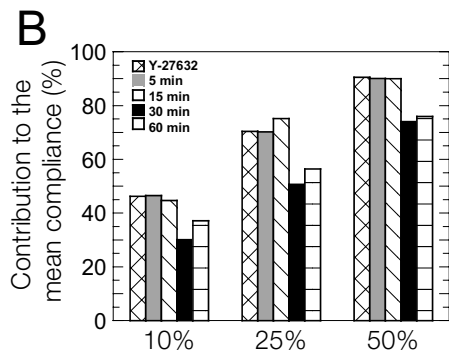

Supplement: mbc_15_7_3475__1.pdf [file mbc_15_7_3475__1.pdf]
